# Supplementary material
Source: MDPI journal article supplement (https://www.mdpi.com/2311-5629/9/4/90)
Supplement: s1 [file s1 › carbon-2565468-supplementary.pdf]

## Supplementary Material

### Towards understanding the factors behind the limited integration of multispecies ecotoxicity assessment in environmental risk characterisation of graphene family materials - A bibliometric review

Ildikó Fekete-Kertész <sup>1</sup>, Krisztina László <sup>2,\*</sup> and Mónika Molnár <sup>1</sup>

<sup>1</sup> Department of Applied Biotechnology and Food Science, Faculty of Chemical Technology and Biotechnology, Budapest University of Technology and Economics, Műegyetem rkp. 3, H-1111 Budapest, Hungary; feke.kertesz.ildiko@vbk.bme.hu (I.F.-K.); molnar.monika@vbk.bme.hu (M.M.)

<sup>2</sup> Department of Physical Chemistry and Materials Science, Faculty of Chemical Technology and Biotechnology, Budapest University of Technology and Economics, Műegyetem rkp. 3, H-1111 Budapest, Hungary

\* Correspondence: laszlo.krisztina@vbk.bme.hu

Table S1: Review articles published in the past 10 years within the scope of ecotoxicology or environmental application of GFMs.

| Year of publication | Review topic and conception                                                                                                                       | Ecotoxicological systems presented and evaluated in the review articles          | Ref. |
|---------------------|---------------------------------------------------------------------------------------------------------------------------------------------------|----------------------------------------------------------------------------------|------|
| 2015                | The ecotoxicity of graphene family materials: current status, knowledge gaps and future needs                                                     | acute and chronic single species tests                                           | [1]  |
| 2017                | Ecotoxicological effects of graphene-based materials                                                                                              | acute and chronic single species tests, WW microbial community                   | [2]  |
| 2017                | Review of environmental life cycle assessment (LCA) studies of graphene production                                                                | LCA study, no detailed analysis in terms of complexity                           | [3]  |
| 2017                | Environmental impact of engineered carbon nanoparticles: from releases to effects on the aquatic biota                                            | acute and chronic single species tests                                           | [4]  |
| 2018                | Safety Assessment of Graphene-Based Materials: Focus on Human Health and the Environment                                                          | human exposure studies, LCA study, acute and chronic single species tests        | [5]  |
| 2018                | An overview of graphene materials: Properties, applications and toxicity on aquatic environments                                                  | acute and chronic single species tests, WW microbial community                   | [6]  |
| 2020                | Toxicity Studies on Graphene-Based Nanomaterials in Aquatic Organisms: Current Understanding                                                      | acute and chronic single species tests                                           | [7]  |
| 2020                | Aquatic nanotoxicology: impact of carbon nanomaterials on algal flora                                                                             | acute and chronic single species tests                                           | [8]  |
| 2021                | Wastewater treatment nexus: Carbon nanomaterials towards potential aquatic ecotoxicity                                                            | acute and chronic single species tests, WW microbial community, trophic transfer | [9]  |
| 2022                | Graphene-based nanomaterials and microbial communities: a review of their interactions, from ecotoxicology to bioprocess engineering perspectives | microbial community studies in different environmental compartments and WW       | [10] |
| 2022                | Graphene-based materials for environmental applications: a review                                                                                 | no detailed analysis in terms of complexity                                      | [11] |

|      |                                                                                                                          |                                                        |      |
|------|--------------------------------------------------------------------------------------------------------------------------|--------------------------------------------------------|------|
| 2022 | Review on Graphene-, Graphene Oxide-, Reduced Graphene Oxide-Based Flexible Composites: From Fabrication to Applications | no detailed analysis in terms of complexity            | [12] |
| 2022 | Insights on synthesis and applications of graphene-based materials in wastewater treatment: A review                     | no detailed analysis in terms of complexity            | [13] |
| 2022 | A review on sustainable production of graphene and related life cycle assessment                                         | LCA study, no detailed analysis in terms of complexity | [14] |
| 2023 | A Review on Properties and Environmental Applications of Graphene and Its Derivative-Based Composites                    | no detailed analysis in terms of complexity            | [15] |

\*WW: wastewater

## References

1. Jastrzębska, A.M.; Olszyna, A.R. The Ecotoxicity of Graphene Family Materials: Current Status, Knowledge Gaps and Future Needs. *Journal of Nanoparticle Research* **2015**, *17*, doi:10.1007/s11051-014-2817-0.
2. Montagner, A.; Bosi, S.; Tenori, E.; Bidussi, M.; Alshatwi, A.A.; Tretiach, M.; Prato, M.; Syrgiannis, Z. Ecotoxicological Effects of Graphene-Based Materials. *2D Materials* **2016**, *4*(1), 12001, doi:10.1088/2053-1583/4/1/012001.
3. Arvidsson, R.; Boholm, M.; Johansson, M.; De Montoya, M.L. “just Carbon”: Ideas About Graphene Risks by Graphene Researchers and Innovation Advisors. *NanoEthics* **2018**, *12*, 199–210, doi:10.1007/s11569-018-0324-y.
4. Mottier, A.; Mouchet, F.; Pinelli, É.; Gauthier, L.; Flahaut, E. Environmental Impact of Engineered Carbon Nanoparticles: From Releases to Effects on the Aquatic Biota. *Current Opinion in Biotechnology* **2017**, *46*, 1–6, doi:10.1016/j.copbio.2016.11.024.
5. Fadeel, B.; Bussy, C.; Merino, S.; Vázquez, E.; Flahaut, E.; Mouchet, F.; Evariste, L.; Gauthier, L.; Koivisto, A.J.; Vogel, U. Safety Assessment of Graphene-based Materials: Focus on Human Health and the Environment. *ACS Nano* **2018**, *12*, 10582–10620, doi:10.1021/acsnano.8b04758.
6. De Marchi, L.; Pretti, C.; Gabriel, B.; Marques, P. A. A. P.; Freitas, R.; Neto, V. An Overview of Graphene Materials: Properties, Applications and Toxicity on Aquatic Environments. *The Science of the total environment* **2018**, 631–632, 1440–1456, <https://doi.org/10.1016/j.scitotenv.2018.03.132>.
7. Malhotra, N.; Villaflores, O.B.; Audira, G.; Siregar, P.; Lee, J.-S.; Ger, T.-R.; Hsiao, C.-D. Toxicity Studies on Graphene-based Nanomaterials in Aquatic Organisms: Current Understanding. *Molecules* **2020**, *25*, 3618, doi:10.3390/molecules25163618.
8. Saxena, P.; Sangela, V.; Ranjan, S.; Dutta, V.; Dasgupta, N.; Phulwaria, M.; Rathore, D.S.; Harish Aquatic Nanotoxicology: Impact of Carbon Nanomaterials on Algal Flora. *Energy, Ecology and Environment* **2020**, *5*, 240–252, doi:10.1007/s40974-020-00151-9.
9. Zhang, C.; Chen, X.; Ho, S.H. Wastewater treatment nexus: Carbon Nanomaterials Towards Potential Aquatic Ecotoxicity. *Journal of Hazardous Materials* **2021**, *417*, 125959, doi:10.1016/j.jhazmat.2021.125959.
10. Braylé, P.; Pinelli, E.; Gauthier, L.; Mouchet, F.; Barret, M. Graphene-based Nanomaterials and Microbial Communities: A Review of Their Interactions, from Ecotoxicology to Bioprocess Engineering Perspectives. *Environmental Science: Nano* **2022**, *9*, 3725–3741, doi:10.1039/d2en00547f.
11. Karthik, V.; Selvakumar, P.; Senthil Kumar, P.; Vo, D.-V.N.; Gokulakrishnan, M.; Keerthana, P.; Tamil Elakkiya, V.; Rajeswari, R. Graphene-based Materials for Environmental Applications: A Review. *Environmental Chemistry Letters* **2021**, *19*, 3631–3644, doi:10.1007/s10311-021-01262-3.
12. Razaq, A.; Bibi, F.; Zheng, X.; Papadakis, R.; Jafri, S.H.M.; Li, H. Review on Graphene-, Graphene Oxide-, Reduced Graphene Oxide-based Flexible Composites: From Fabrication to Applications. *Materials* **2022**, *15*, 1012, doi:10.3390/ma15031012.
13. Saravanan, A.; Kumar, P.S.; Srinivasan, S.; Jeevanantham, S.; Vishnu, M.; Amith, K.V.; Sruthi, R.; Saravanan, R.; Vo, D.-V.N. (2022). Insights on Synthesis and Applications of Graphene-Based Materials in Wastewater Treatment: A Review. *Chemosphere* **2022**, *298*, 134284, doi:10.1016/j.chemosphere.2022.134284.
14. Munuera, J.; Britnell, L.; Santoro, C.; Cuéllar-Franca, R.; Casiraghi, C. A Review on Sustainable Production of Graphene and Related Life Cycle Assessment. *2D Materials* **2022**, *9*, 012002, doi:10.1088/2053-1583/ac3f23.
15. Kumar, S.; Himanshi; Prakash, J.; Verma, A.; Suman; Jasrotia, R.; Kandwal, A.; Verma, R.; Kumar Godara, S.; Khan, M.A.M. A Review on Properties and Environmental Applications of Graphene and Its Derivative-based Composites. *Catalysts* **2023**, *13*, 111, doi:10.3390/catal13010111.
